# Supplementary material
Source: Elsevier journal article supplement (https://bescom.ieasybill.com/RAPDRPBILLINGPHOTO/TRM_NONRAPDRP/METER_CALIBRATION/2023-03/1451111220023/mmc1.pdf)
Supplement: mmc1 [file mmc1.pdf]

**TAX INVOICE**

(See Rule 46 of the Central Goods &amp; Services Tax Rules, 2017)

**Landis+Gyr Limited****ಲ್ಯಾಂಡಿಸ್ + ಗೇರ್ ಲಿಮಿಟೆಡ್****Landis+Gyr**

**R. O. Address :**  
 No. 503, 1st Floor, 3rd Main,  
 50 Feet Road, Hanumanthnagar,  
 BENGALURU - 560050.  
 Ph.: 080-26678515

**Branch Office Address :**  
 O/o Executive Engineer, O&M Division,  
 CESCO, HN Pura Road, Near KSRTC Bus stand,  
 HASSAN - 573201.

Customer Name Jayaram Lakshmi  
 Address 1st Floor, 3rd Main, 50 Feet Road, Hanumanthnagar, Bengaluru - 560050.  
Ph.: 080-26678515  
 GSTIN :

BILL No. **HSN/22/** 06578  
 DATE : 01/08/27 TIME : AM/PM  
 GSTIN : **29AAACV9922B1ZA**

| Sl. No.                                                                    | Description of Goods / Services                                                                                                                                | Quantity (Nos.) | Rate per Pc Rs. | Value Amount Rs. | P. |
|----------------------------------------------------------------------------|----------------------------------------------------------------------------------------------------------------------------------------------------------------|-----------------|-----------------|------------------|----|
|                                                                            | HSN Code : 90283010<br>Single / Three Phase / LTCT Static Energy Meter<br>Model : E150 / E250 / E650, 5-30 Amps / -/5 Amps<br>Serial Nos.<br><u>010 703802</u> |                 | <u>5600</u>     | <u>5600</u>      |    |
| CESCO DVN : <u>21/2016</u> Date <u>01/08/27</u><br>W.O. No. <u>21/2016</u> |                                                                                                                                                                | CGST @ 9%       |                 | <u>510</u>       |    |
| Total Invoice Value (In Words) :                                           |                                                                                                                                                                | SGST @ 9%       |                 | <u>510</u>       |    |
|                                                                            |                                                                                                                                                                | GRAND TOTAL     |                 | <u>67100</u>     |    |

E.&amp;O.E.

1<sup>st</sup> Copy Original : White  
 2<sup>nd</sup> Copy Duplicate : Pink  
 3<sup>rd</sup> Copy Triplicate : Yellow  
 4<sup>th</sup> Copy Extra : Blue

For **Landis+Gyr Limited**

Signature
